# Supplementary material for: A functional hybrid polyoxometalate framework based on a ‘trilacunary’ heteropolyanion [(P4W6O34)2Co2Na2(H2O)2]18−
Source: Royal Society of Chemistry journal article supplement (doi:10.1039/b907410d), 2009-01-01
Supplement: b907410d.pdf [file b907410d.pdf]

## A functional hybrid polyoxometalate framework based on a ‘trilacunary’ heteropolyanion $[(P_4W_6O_{34})_2Co_2Na_2(H_2O)_2]^{18-}$ †

Chris Ritchie,<sup>§a</sup> Fengyan Li,<sup>§a,b</sup> Chullikkattil P. Pradeep, De-liang Long,<sup>a</sup> Lin Xu<sup>\*b</sup> and Leroy Cronin<sup>\*a</sup>

<sup>a</sup> WestCHEM, Department of Chemistry, University of Glasgow, Joseph Black Building, University Avenue, Glasgow, UK G12 8QQ. Fax: +44 141 330 4888; Tel: +44 141 330 6650;

E-mail: L.Cronin@chem.gla.ac.uk

<sup>b</sup> Key Laboratory of Polyoxometalate Science of Ministry of Education, Department of Chemistry, Northeast Normal University, Changchun, Jilin, People's Republic of China. Fax:

+86 431 85099668; Tel: +86 431 85099668; E-mail: linxu@nenu.edu.cn

### Full Synthesis

Na<sub>2</sub>WO<sub>4</sub>·2H<sub>2</sub>O (8.25 g, 25 mmol), was dissolved in 100 ml 1M NaCl and the pH was adjusted to 3.5 using 4M nitric acid. N, N'-bis(2-hydroxyethyl)piperazine (4.75 g, 27 mmol) is then added followed by 85% H<sub>3</sub>PO<sub>4</sub> (2.05 g, 17.7 mmol). This solution is then stirred until all white precipitate redissolves, and Co(NO<sub>3</sub>)<sub>2</sub>·6H<sub>2</sub>O (2.18 g, 7.5 mmol) is added as solid. At this point a large amount of purple precipitate forms, and the solution is then heated to 75 °C and stirred vigorously until all this purple precipitate dissolves. A small amount of CoHPO<sub>4</sub> is then separated by centrifugation after cooling to room temperature, with a final pH of 6.1. A small amount of (H<sub>2</sub>bhep)<sub>3</sub>Na<sub>4</sub>[B-α-P<sub>2</sub>W<sub>18</sub>Co<sub>4</sub>O<sub>68</sub>]·15H<sub>2</sub>O is separated after 1 day. Pale purple crystals form over a two weeks period. (Yield = 800 mg, 0.18 mmol, 8.68 % based on W) Elemental analysis for (H<sub>2</sub>bhep)<sub>2</sub>Na<sub>10</sub>[P<sub>8</sub>W<sub>12</sub>Co<sub>2</sub>Na<sub>2</sub>(H<sub>2</sub>O)<sub>2</sub>O<sub>68</sub>{Co<sub>2</sub>(H<sub>2</sub>O)<sub>4</sub>}]·8H<sub>2</sub>O (%), C<sub>16</sub>H<sub>68</sub>N<sub>4</sub>Na<sub>12</sub>Co<sub>4</sub>O<sub>86</sub>P<sub>8</sub>W<sub>12</sub>; Calc; C 4.13, H 1.47, N 1.20, Na 6.00; found: C 4.35, H 2.07, N 1.41, Na 5.92. Characteristic IR bands (KBr): 3445 (br), 1637 (m), 1467 (wk), 1384 (sh), 1124 (wk), 1056 (m), 1019 (w), 939 (m), 894 (m), 841 (m), 701 (m), 528 (w), 457 (w), 411 (w) cm<sup>-1</sup>.

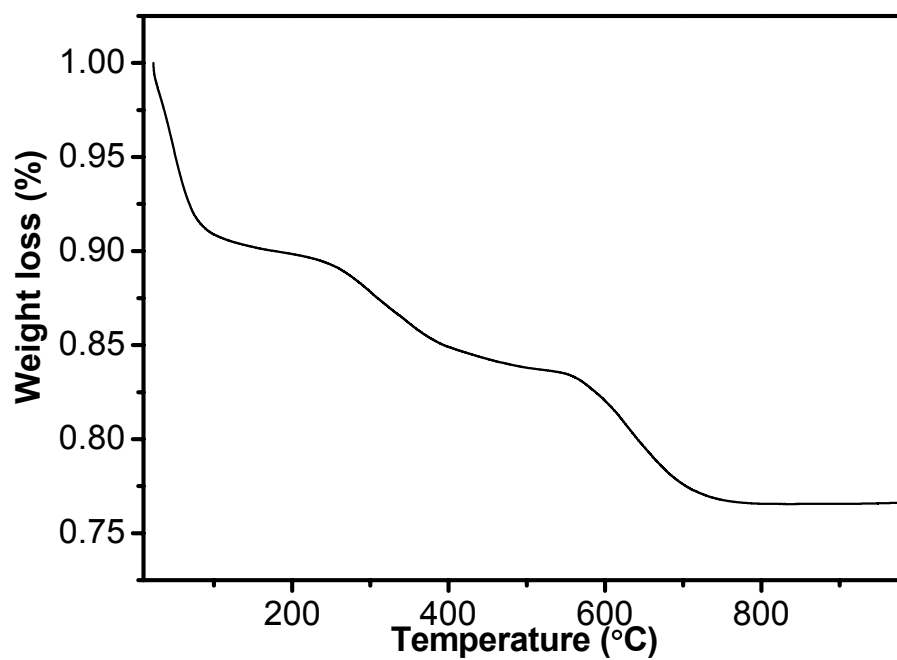

Figure S1(a) TG curve of compound 1.

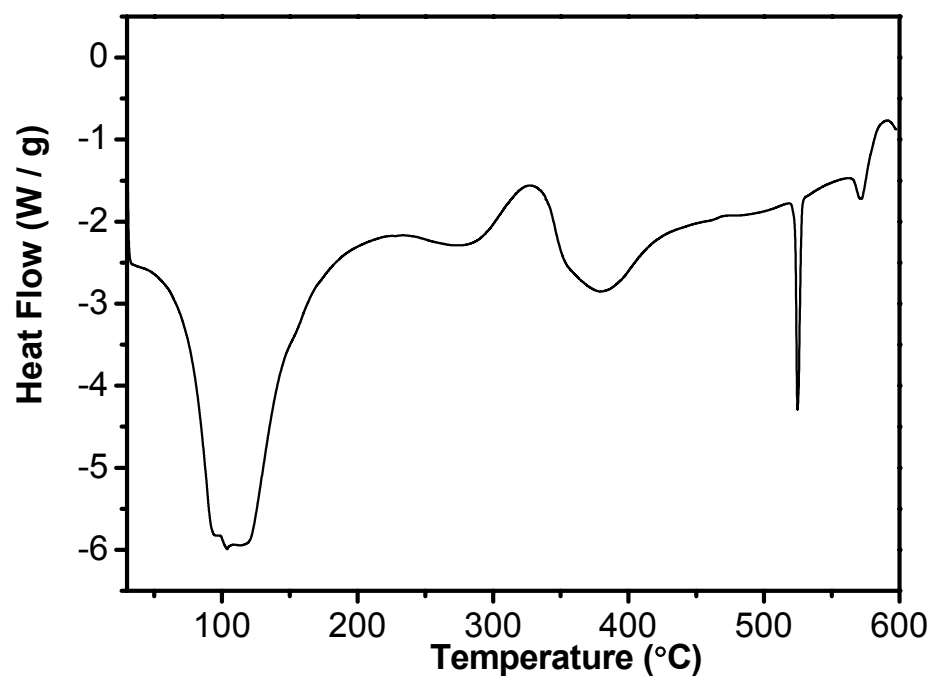

Figure S1(b) DSC curve of compound 1.

## UV-Vis Absorption Spectra of the Pink and Blue crystals of Compound 1.

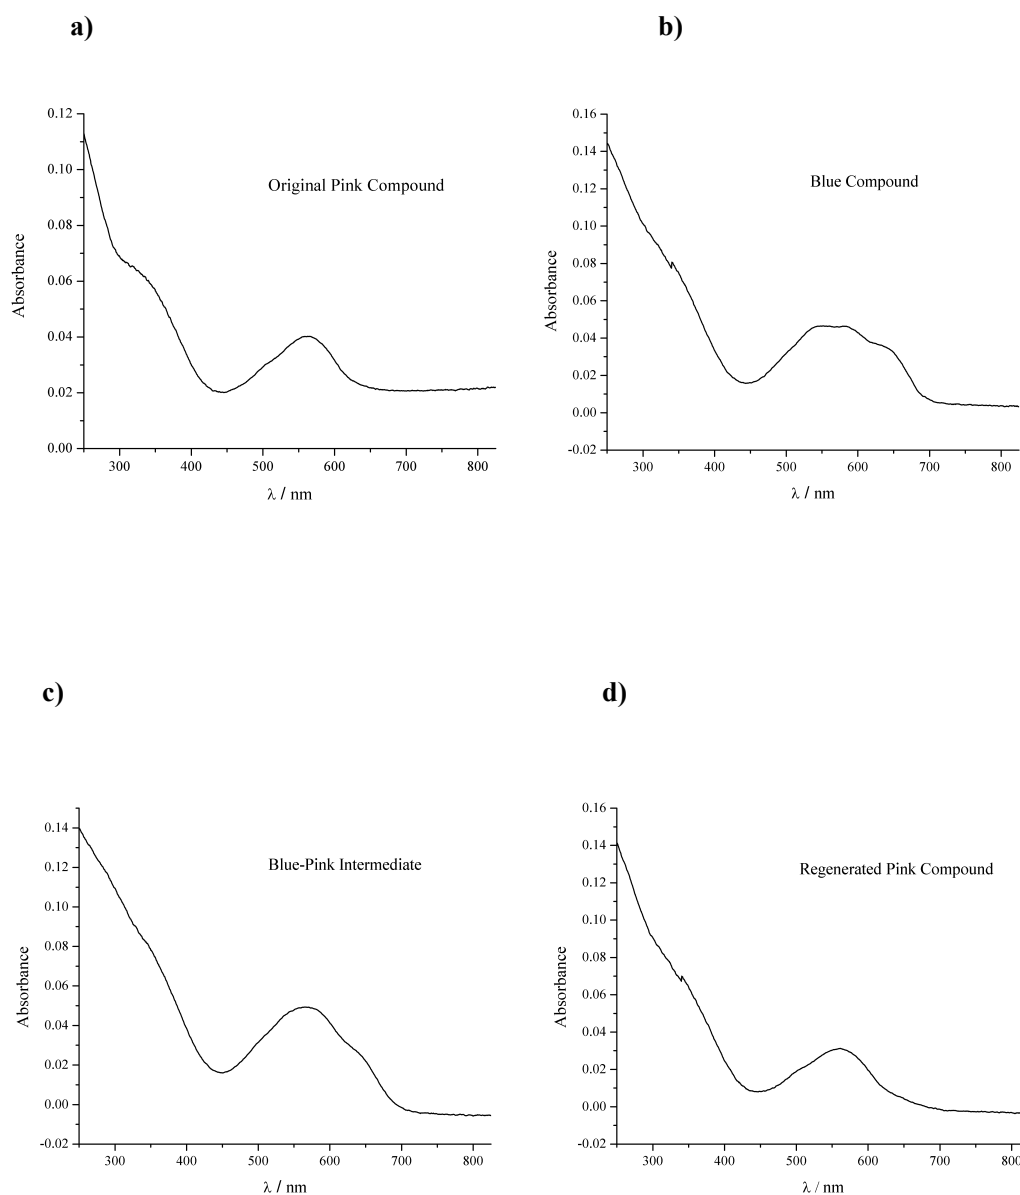

**Figure S2(a-d)** UV-Vis spectra of compound 1.

The UV-Vis spectra of the powdered samples of the pink and blue samples of compound 1 were measured and the spectra are shown above (**Figures S2 a** and **b** respectively). As expected, these two compounds showed considerable difference in their d-d absorption in the 450-700 nm region. For instance, the broad absorption shown by the pink compound at  $\sim 560$  nm is split into two (538 and 584 nm) in the case of blue compound. Also a new absorption peak at  $\sim 640$  nm is appears in the UV-Vis spectrum of the

blue compound.

To confirm the reversibility of the pink-blue conversion, we did experiments in which the blue compound was exposed to an atmosphere of water vapour in a closed sample vial. During this process it was observed that, the blue compound slowly turns back to pink and we measured the electronic spectrum of a bluish-pink intermediate coloured compound obtained after ~ 1h (**Figure S2 c**), which clearly showed that the transition is not complete. However after exposing the blue sample to water vapour overnight, the transformation was found to be complete (**Figure S2 d**) giving a spectrum that is almost identical to that of the original pink compound (**Figure S2 a**).
